# Supplementary material for: Synthesis of a phosphinated tetracyanate ester and its miscible blend with 4,4′-oxydianiline/phenol-based benzoxazine
Source: Royal Society of Chemistry journal article supplement (doi:10.1039/c4ra13885f), 2015-01-01
Supplement: c4ra13885f1.pdf [file c4ra13885f1.pdf]

Supplementary information

Synthesis of a phosphinated tetracyanate ester and its miscible blend with  
4,4'-oxydianiline/phenol-based benzoxazine

Ching Hsuan Lin, Meng Wei Wang, Yu Wei Chou, a Hou Chien Chang, Tzong Yuan Juang, Wen

Chiung Su

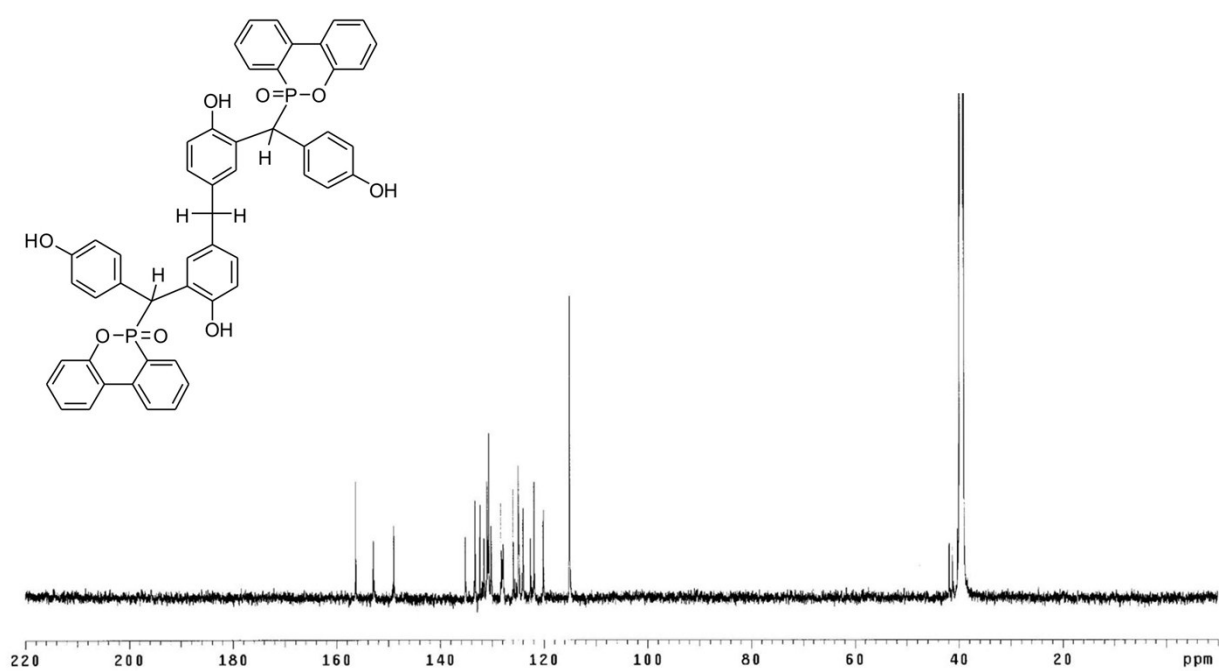

Figure S1. <sup>13</sup>C-NMR spectrum of (3).
